# Supplementary material for: ROR2 knockdown suppresses breast cancer growth through PI3K/ATK signaling
Source: publisher site journal article supplement (doi:10.18632/aging.103400), 2020-07-02
Supplement: Supplementary file [file aging-v12i13-103400-supplementary-material-SD1.pdf]

## SUPPLEMENTARY FIGURE

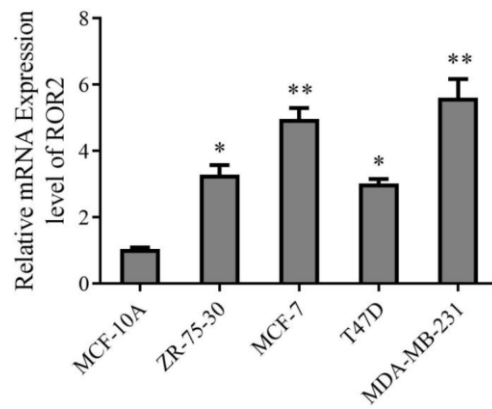

Supplementary Figure 1. The expression of ROR2 in different BC cell lines.\* $p < 0.05$ , \*\* $p < 0.01$ .
